# Supplementary material
Source: PubMed Central journal article supplement (PMC4316202)
Supplement: NIHMS651039-supplement-Supplementary_Tables_1-5.pdf [file NIHMS651039-supplement-Supplementary_Tables_1-5.pdf]

**Supplemental Material:****Table S1:** Validation of copy number determinations by Real Time PCR

| <b>SNP ID</b> | <b>Adjacent Gene</b> | <b>Sample</b> | <b>Copy Number by Real-Time PCR</b> | <b>Copy Number by CCNT</b> |
|---------------|----------------------|---------------|-------------------------------------|----------------------------|
| SNP_A-1712744 | CDKN2A               | HF505         | 0.10                                | 0.47                       |
|               |                      | HF1382        | 0.14                                | 0.40                       |
|               |                      | HF1122        | 0.19                                | 0.50                       |
|               |                      | HF1618        | 0.38                                | 0.76                       |
|               |                      | HF1313        | 0.47                                | 0.53                       |
|               |                      | HF1344        | 1.81                                | 2.02                       |
|               |                      | HF17          | 2.20                                | 2.05                       |
|               |                      | HF608         | 1.86                                | 2.06                       |
|               |                      | HF1220        | 2.04                                | 1.93                       |
| SNP_A-1666130 | EGFR                 | HF990         | 42.27                               | 56.20                      |
|               |                      | HF811         | 52.61                               | 53.96                      |
|               |                      | HF118         | 71.73                               | 37.36                      |
|               |                      | HF1490        | 39.19                               | 35.56                      |
|               |                      | HF408         | 45.38                               | 31.42                      |
|               |                      | HF1540        | 106.59                              | 31.38                      |
|               |                      | HF1534        | 72.37                               | 30.32                      |
|               |                      | HF1380        | 1.61                                | 2.09                       |
|               |                      | HF471         | 2.06                                | 2.08                       |
|               |                      | HF453         | 2.06                                | 2.08                       |
|               |                      | HF953         | 1.97                                | 2.07                       |
|               |                      | HF218         | 2.49                                | 2.09                       |
|               |                      | HF1246        | 2.4                                 | 2.07                       |
|               |                      | HF914         | 2.37                                | 2.05                       |
| SNP_A-1713144 | KIF21B               | HF1458        | 4.62                                | 5.29                       |
|               |                      | HF1178        | 4.18                                | 5.25                       |
|               |                      | HF1382-1      | 2.76                                | 2.20                       |
|               |                      | HF1628        | 2.26                                | 2.12                       |

**Table S2:** List of regions found homozygously deleted in more than 10% of the samples assayed (by histopathological group).

| Chr | Start bp  | End bp    | S<br>N<br>P<br># | Starting Band | Ending Band | Gene(s)                  | All<br>max | GBM<br>max | ASTRO<br>max | OLIGO<br>max | MIXED<br>max |
|-----|-----------|-----------|------------------|---------------|-------------|--------------------------|------------|------------|--------------|--------------|--------------|
| 1   | 31881013  | 31881013  | 1                | p35.2         | p35.2       | PTP4A2                   | 7%         | 4%         | 9%           | 12%          | 8%           |
| 2   | 11689185  | 11689185  | 1                | p25.1         | p25.1       | E2F6/GREB1               | 10%        | 10%        | 18%          | 6%           | 0%           |
| 2   | 24374921  | 24374921  | 1                | p23.3         | p23.3       | FLJ30851                 | 21%        | 15%        | 24%          | 29%          | 17%          |
| 2   | 240837079 | 240837079 | 1                | q37.3         | q37.3       | NDUFA10                  | 16%        | 16%        | 12%          | 15%          | 25%          |
| 3   | 84048722  | 84048722  | 1                | p12.1         | p12.1       | GBE1                     | 19%        | 13%        | 15%          | 33%          | 17%          |
| 3   | 164638732 | 164638732 | 1                | q26.1         | q26.1       | Predicted, not confirmed | 10%        | 5%         | 9%           | 21%          | 0%           |
| 4   | 145491988 | 145491988 | 1                | q31.21        | q31.21      | GYPA/GYPB/GYPE           | 16%        | 13%        | 18%          | 19%          | 8%           |
| 9   | 21418461  | 23395248  | 7<br>2           | p21.3         | p21.3       | CDKN2B                   | 12%        | 21%        | 6%           | 2%           | 17%          |
| 9   | 24901674  | 24901674  | 1                | p21.3         | p21.3       | LOC389708/E<br>LAVL2     | 8%         | 11%        | 6%           | 2%           | 17%          |
| 9   | 125102976 | 125102976 | 1                | q33.3         | q33.3       | RALGPS1                  | 19%        | 11%        | 27%          | 27%          | 8%           |
| 10  | 47305407  | 47305407  | 1                | q11.22        | q11.22      | LOC387680/<br>ANXA8      | 10%        | 9%         | 15%          | 8%           | 8%           |
| 10  | 134796267 | 134796267 | 1                | q26.3         | q26.3       | CYP2E1                   | 14%        | 13%        | 12%          | 17%          | 8%           |
| 11  | 3367369   | 3367369   | 1                | p15.4         | p15.4       | ZNF195                   | 2%         | 1%         | 0%           | 0%           | 17%          |
| 12  | 49374124  | 49374124  | 1                | q13.12        | q13.12      | KIAA1463                 | 8%         | 7%         | 9%           | 8%           | 17%          |
| 13  | 49962325  | 49962325  | 1                | q14.3         | q14.3       | WDFY2                    | 25%        | 24%        | 18%          | 31%          | 25%          |
| 15  | 19848871  | 19939343  | 5                | q11.2         | q11.2       | OR4M2                    | 8%         | 12%        | 6%           | 6%           | 0%           |
| 17  | 37525468  | 37525468  | 1                | q12           | q12         | LASP1/PLXD<br>C1         | 6%         | 4%         | 9%           | 4%           | 17%          |
| 19  | 41602840  | 41602840  | 1                | q13.12        | q13.12      | ZNF566/ZNF<br>545        | 11%        | 9%         | 12%          | 12%          | 17%          |

**Table S3:** List of regions found heterozygously deleted in more than 10% of the samples assayed (by histopathological group).

| Chr | Start bp  | End bp    | Length (bp) | SN P # | Starting Band | Ending Band | Gene(s)             | All max | GBM max | ASTRO max | OLIGO max | MIXED max |
|-----|-----------|-----------|-------------|--------|---------------|-------------|---------------------|---------|---------|-----------|-----------|-----------|
| 1   | 3504300   | 5439054   | 1934755     | 26     | p36.32        | p36.31      | NPHP4/SHR<br>EW1    | 7%      | 5%      | 0%        | 10%       | 25%       |
| 1   | 28857071  | 28946826  | 89756       | 2      | p35.3         | p35.3       | OPRD1               | 5%      | 1%      | 0%        | 12%       | 17%       |
| 1   | 31881013  | 31881013  | 1           | 1      | p35.2         | p35.2       | PTP4A2              | 23%     | 21%     | 21%       | 25%       | 33%       |
| 1   | 52157227  | 52157227  | 1           | 1      | p32.3         | p32.3       | MADHIP              | 11%     | 11%     | 12%       | 10%       | 17%       |
| 1   | 52325376  | 52325376  | 1           | 1      | p32.3         | p32.3       | ZCCHC11             | 10%     | 10%     | 9%        | 10%       | 17%       |
| 1   | 92942515  | 92951992  | 9478        | 2      | p22.1         | p22.1       | RPL5/M96            | 9%      | 9%      | 3%        | 10%       | 25%       |
| 1   | 112492091 | 112492091 | 1           | 1      | p13.2         | p13.2       | CAPZA1              | 16%     | 20%     | 12%       | 13%       | 17%       |
| 1   | 143300202 | 143400096 | 99895       | 2      | q21.1         | q21.1       | ZNF364              | 12%     | 10%     | 12%       | 13%       | 17%       |
| 1   | 147680354 | 147680354 | 1           | 1      | q21.2         | q21.2       | FLJ12528            | 6%      | 5%      | 0%        | 12%       | 8%        |
| 1   | 240825227 | 240825227 | 1           | 1      | q44           | q44         | AKT3                | 7%      | 1%      | 9%        | 10%       | 25%       |
| 2   | 11689185  | 11689185  | 1           | 1      | p25.1         | p25.1       | E2F6/GREB<br>1      | 28%     | 27%     | 36%       | 27%       | 25%       |
| 2   | 32056632  | 32270803  | 214172      | 3      | p22.3         | p22.3       | SRD5A2              | 7%      | 5%      | 12%       | 6%        | 17%       |
| 2   | 240837079 | 240837079 | 1           | 1      | q37.3         | q37.3       | NDUFA10             | 33%     | 32%     | 36%       | 31%       | 42%       |
| 3   | 51445618  | 51445618  | 1           | 1      | p21.2         | p21.2       | VprBP               | 14%     | 13%     | 12%       | 17%       | 17%       |
| 3   | 195694521 | 195694521 | 1           | 1      | q29           | q29         | FLJ11301            | 19%     | 15%     | 24%       | 23%       | 25%       |
| 4   | 123729796 | 123729796 | 1           | 1      | q27           | q27         | KIAA1109            | 8%      | 9%      | 12%       | 6%        | 0%        |
| 4   | 145491988 | 145491988 | 1           | 1      | q31.21        | q31.21      | GYPB/GYP<br>B/GYPE  | 26%     | 23%     | 30%       | 31%       | 25%       |
| 5   | 24067683  | 24067683  | 1           | 1      | p14.2         | p14.2       | C5orf17             | 15%     | 22%     | 9%        | 10%       | 8%        |
| 5   | 74456214  | 74456214  | 1           | 1      | q13.3         | q13.3       | FLJ40191/C<br>2GNT3 | 11%     | 20%     | 6%        | 4%        | 0%        |
| 6   | 74559155  | 74559155  | 1           | 1      | q13           | q13         | COL12A1             | 11%     | 13%     | 6%        | 12%       | 8%        |
| 6   | 78531227  | 78531227  | 1           | 1      | q14.1         | q14.1       | HTR1B/PHI<br>P      | 16%     | 13%     | 18%       | 19%       | 25%       |
| 6   | 86500178  | 86500178  | 1           | 1      | q14.3         | q14.3       | HTR1E               | 8%      | 11%     | 9%        | 6%        | 0%        |
| 6   | 95539463  | 95539463  | 1           | 1      | q16.1         | q16.1       | EPHA7/MA<br>NEA     | 13%     | 16%     | 12%       | 8%        | 17%       |
| 6   | 123221830 | 123221830 | 1           | 1      | q22.31        | q22.31      | TRDN/SMP<br>DL3A    | 15%     | 18%     | 15%       | 10%       | 8%        |
| 7   | 250149    | 250149    | 1           | 1      | p22.3         | p22.3       | FAM20C              | 8%      | 6%      | 15%       | 8%        | 8%        |
| 8   | 39206202  | 39206849  | 648         | 2      | p11.23        | p11.23      | ADAM32              | 7%      | 4%      | 9%        | 8%        | 25%       |
| 8   | 54822894  | 54888299  | 65406       | 2      | q11.23        | q11.23      | RGS20               | 12%     | 10%     | 15%       | 10%       | 33%       |

|    |               |               |              |         |        |        |                                |     |     |    |     |     |
|----|---------------|---------------|--------------|---------|--------|--------|--------------------------------|-----|-----|----|-----|-----|
| 8  | 14607<br>3119 | 14608<br>6167 | 13049        | 2       | q24.3  | q24.3  | ZNF7                           | 8%  | 2%  | 9% | 15% | 8%  |
| 9  | 49493<br>31   | 49493<br>31   | 1            | 1       | p24.1  | p24.1  | JAK2/RCL1                      | 7%  | 11% | 3% | 4%  | 8%  |
| 9  | 92852<br>81   | 11056<br>050  | 1770770      | 93      | p23    | p23    | TYRP1/PTP<br>RD                | 7%  | 12% | 3% | 2%  | 8%  |
| 9  | 11489<br>438  | 14769<br>526  | 3280089      | 10<br>4 | p23    | p22.3  | MPDZ/NFI<br>B                  | 9%  | 15% | 3% | 2%  | 17% |
| 9  | 15384<br>347  | 15964<br>495  | 580149       | 6       | p22.3  | p22.3  | SNAPC3                         | 8%  | 13% | 3% | 2%  | 17% |
| 9  | 16598<br>962  | 16989<br>398  | 390437       | 14      | p22.2  | p22.2  | C9orf39/                       | 7%  | 11% | 3% | 2%  | 17% |
| 9  | 17365<br>677  | 18382<br>597  | 1016921      | 32      | p22.2  | p22.2  | SH3GL2                         | 8%  | 12% | 6% | 4%  | 17% |
| 9  | 18776<br>181  | 29850<br>957  | 1107477<br>7 | 39<br>2 | p22.1  | p21.1  | CDKN2B                         | 22% | 34% | 9% | 10% | 33% |
| 9  | 26945<br>661  | 27830<br>948  | 885288       | 41      | p21.2  | p21.2  | TEK                            | 12% | 18% | 3% | 8%  | 17% |
| 9  | 31197<br>631  | 31362<br>120  | 164490       | 6       | p21.1  | p21.1  | FLJ31810                       | 8%  | 11% | 0% | 6%  | 25% |
| 9  | 33299<br>913  | 33299<br>913  | 1            | 1       | p13.3  | p13.3  | NFX1                           | 6%  | 11% | 0% | 2%  | 0%  |
| 9  | 34016<br>538  | 34016<br>538  | 1            | 1       | p13.3  | p13.3  | UBAP2                          | 7%  | 12% | 0% | 2%  | 8%  |
| 9  | 72765<br>829  | 73138<br>937  | 373109       | 7       | q21.13 | q21.13 | RORB/TRP<br>M6                 | 12% | 16% | 6% | 8%  | 25% |
| 9  | 88458<br>723  | 88538<br>294  | 79572        | 4       | q22.2  | q22.2  | GADD45G                        | 8%  | 12% | 0% | 4%  | 17% |
| 9  | 95438<br>913  | 95439<br>379  | 467          | 2       | q22.33 | q22.33 | KIAA1529                       | 9%  | 13% | 3% | 2%  | 25% |
| 9  | 10350<br>6143 | 10372<br>9069 | 222927       | 5       | q31.1  | q31.1  | CDW92                          | 8%  | 11% | 0% | 6%  | 17% |
| 9  | 12311<br>3824 | 12311<br>3824 | 1            | 1       | q33.3  | q33.3  | C9orf126                       | 12% | 16% | 6% | 8%  | 25% |
| 10 | 24895<br>3    | 48733<br>1    | 238379       | 4       | p15.3  | p15.3  | ZMYND11                        | 13% | 22% | 6% | 0%  | 25% |
| 10 | 86529<br>1    | 58694<br>13   | 5004123      | 12<br>5 | p15.3  | p15.1  | ADARB2                         | 12% | 21% | 6% | 2%  | 25% |
| 10 | 31603<br>65   | 52776<br>05   | 2117241      | 71      | p15.2  | p15.1  | AKRIC3                         | 12% | 20% | 6% | 2%  | 25% |
| 10 | 64070<br>56   | 81961<br>55   | 1789100      | 60      | p15.1  | p14    | SFMBT2/FL<br>J14641            | 11% | 20% | 3% | 0%  | 25% |
| 10 | 62995<br>54   | 21277<br>444  | 1497789<br>1 | 44<br>3 | p15.1  | p12.31 | GATA3/CU<br>GBP2               | 15% | 23% | 9% | 4%  | 33% |
| 10 | 22280<br>825  | 23705<br>106  | 1424282      | 30      | p12.31 | p12.2  | PIP5K2A                        | 12% | 22% | 3% | 0%  | 25% |
| 10 | 24421<br>359  | 26030<br>905  | 1609547      | 44      | p12.2  | p12.1  | PRTFDC1                        | 13% | 23% | 3% | 0%  | 25% |
| 10 | 26457<br>174  | 28407<br>398  | 1950225      | 37      | p12.1  | p12.1  | RAB18                          | 13% | 23% | 3% | 0%  | 25% |
| 10 | 28804<br>176  | 31966<br>468  | 3162293      | 69      | p12.1  | p11.22 | MAP3K8/L<br>OC220929<br>0.15   | 15% | 24% | 9% | 2%  | 25% |
| 10 | 32257<br>715  | 35094<br>481  | 2836767      | 85      | p11.22 | p11.21 | PARD3                          | 14% | 24% | 6% | 0%  | 25% |
| 10 | 43738<br>192  | 44445<br>115  | 706924       | 18      | q11.21 | q11.21 | CXCL12/C1<br>0orf10/RAS<br>SF4 | 11% | 20% | 3% | 0%  | 25% |
| 10 | 44926<br>540  | 45251<br>774  | 325235       | 8       | q11.21 | q11.21 | LOC338579/<br>ALOX5            | 12% | 21% | 3% | 0%  | 25% |
| 10 | 49980<br>903  | 55670<br>995  | 5690093      | 16<br>4 | q11.23 | q21.1  | PCDH15                         | 15% | 26% | 3% | 2%  | 25% |

|    |               |               |              |         |        |        |                        |     |     |     |     |     |
|----|---------------|---------------|--------------|---------|--------|--------|------------------------|-----|-----|-----|-----|-----|
| 10 | 56131<br>037  | 70695<br>614  | 1456457<br>8 | 32<br>7 | q21.1  | q22.1  | CTNNA3                 | 16% | 27% | 12% | 2%  | 33% |
| 10 | 71695<br>382  | 72074<br>785  | 379404       | 8       | q22.1  | q22.1  | PRF1                   | 12% | 22% | 3%  | 0%  | 25% |
| 10 | 72462<br>702  | 74402<br>960  | 1940259      | 20      | q22.1  | q22.2  | ASCC1/CB<br>ARA1       | 17% | 26% | 15% | 4%  | 25% |
| 10 | 75427<br>240  | 76244<br>790  | 817551       | 8       | q22.2  | q22.2  | MYST4                  | 17% | 26% | 15% | 2%  | 25% |
| 10 | 76996<br>784  | 78872<br>221  | 1875438      | 51      | q22.2  | q22.3  | C10orf11               | 12% | 21% | 3%  | 0%  | 25% |
| 10 | 79931<br>521  | 79931<br>521  | 1            | 1       | q22.3  | q22.3  | RPS24/RAI1<br>7/RPS24  | 10% | 17% | 3%  | 0%  | 25% |
| 10 | 81697<br>585  | 86659<br>327  | 4961743      | 15<br>7 | q22.3  | q23.2  | MGC16186               | 14% | 23% | 6%  | 2%  | 25% |
| 10 | 87158<br>994  | 87444<br>447  | 285454       | 7       | q23.2  | q23.2  | GRID1/PTE<br>N         | 12% | 22% | 3%  | 0%  | 25% |
| 10 | 88927<br>564  | 94715<br>137  | 5787574      | 16<br>3 | q23.31 | q23.33 | HHEX/SEC<br>15L1       | 15% | 26% | 9%  | 2%  | 25% |
| 10 | 95177<br>397  | 96434<br>356  | 1256960      | 29      | q23.33 | q23.33 | CYP2C9                 | 15% | 26% | 9%  | 0%  | 25% |
| 10 | 96960<br>509  | 99078<br>789  | 2118281      | 38      | q24.1  | q24.2  | TLL2                   | 16% | 27% | 9%  | 2%  | 25% |
| 10 | 99489<br>893  | 99562<br>720  | 72828        | 3       | q24.2  | q24.2  | C10orf28/C<br>RTAC1    | 15% | 26% | 6%  | 2%  | 25% |
| 10 | 10019<br>7589 | 11202<br>4327 | 1182673<br>9 | 27<br>3 | q24.2  | q25.2  | NT5C2                  | 16% | 26% | 12% | 2%  | 25% |
| 10 | 11221<br>0081 | 11418<br>4432 | 1974352      | 42      | q25.2  | q25.2  | VTI1A                  | 15% | 24% | 9%  | 2%  | 25% |
| 10 | 11473<br>1530 | 11929<br>6833 | 4565304      | 11<br>5 | q25.3  | q26.11 | ATRNL1                 | 15% | 24% | 9%  | 2%  | 25% |
| 10 | 12039<br>3221 | 12284<br>1747 | 2448527      | 44      | q26.11 | q26.13 | GRK5                   | 19% | 26% | 12% | 12% | 25% |
| 10 | 12423<br>4742 | 12439<br>8369 | 163628       | 7       | q26.13 | q26.13 | C10orf88/C1<br>0orf89  | 12% | 22% | 3%  | 0%  | 25% |
| 10 | 12652<br>1648 | 12808<br>4104 | 1562457      | 34      | q26.13 | q26.2  | ADAM12                 | 14% | 24% | 6%  | 0%  | 25% |
| 10 | 13132<br>6705 | 13143<br>5203 | 108499       | 2       | q26.3  | q26.3  | MGC33437               | 11% | 17% | 6%  | 0%  | 25% |
| 10 | 13152<br>7334 | 13166<br>6811 | 139478       | 2       | q26.3  | q26.3  | TXNL2/TC<br>ERG1L      | 11% | 18% | 6%  | 0%  | 25% |
| 10 | 13282<br>2357 | 13479<br>6267 | 1973911      | 4       | q26.3  | q26.3  | CYP2E1                 | 29% | 34% | 15% | 27% | 33% |
| 11 | 13531<br>50   | 13531<br>50   | 1            | 1       | p15.5  | p15.5  | TOLLIP/ST<br>K29       | 7%  | 4%  | 12% | 10% | 8%  |
| 11 | 36964<br>05   | 36964<br>05   | 1            | 1       | p15.4  | p15.4  | NUP98/NUP<br>98/NUP98  | 6%  | 4%  | 12% | 6%  | 8%  |
| 11 | 53509<br>77   | 55833<br>17   | 232341       | 11      | p15.4  | p15.4  | UBQLN3/                | 4%  | 2%  | 12% | 2%  | 8%  |
| 11 | 10208<br>414  | 10311<br>303  | 102890       | 5       | p15.4  | p15.4  | CMT4B2                 | 6%  | 5%  | 12% | 2%  | 8%  |
| 11 | 33384<br>473  | 33384<br>473  | 1            | 1       | p13    | p13    | HIPK3/G2               | 3%  | 0%  | 12% | 2%  | 8%  |
| 11 | 56445<br>190  | 56546<br>772  | 101583       | 4       | q11    | q11    | AGTRL1/FL<br>J31393    | 5%  | 2%  | 12% | 6%  | 0%  |
| 11 | 62613<br>871  | 62842<br>498  | 228628       | 4       | q12.3  | q12.3  | LOC387601/<br>MGC34821 | 8%  | 6%  | 15% | 8%  | 8%  |
| 11 | 12850<br>0322 | 12850<br>0322 | 1            | 1       | q24.3  | q24.3  | RICS                   | 28% | 23% | 30% | 37% | 8%  |
| 12 | 10965<br>1774 | 10965<br>1774 | 1            | 1       | q24.11 | q24.11 | PPP1CC                 | 18% | 20% | 15% | 17% | 17% |
| 13 | 38346<br>606  | 38496<br>850  | 150245       | 2       | q14.11 | q14.11 | COG6                   | 6%  | 11% | 3%  | 2%  | 0%  |

|    |               |               |              |         |        |        |                              |     |     |     |     |     |
|----|---------------|---------------|--------------|---------|--------|--------|------------------------------|-----|-----|-----|-----|-----|
| 13 | 70611<br>837  | 73088<br>480  | 2476644      | 99      | q21.33 | q22.2  | C13orf24                     | 7%  | 12% | 0%  | 4%  | 0%  |
| 13 | 73446<br>514  | 73952<br>056  | 505543       | 16      | q22.2  | q22.2  | NA                           | 6%  | 11% | 0%  | 2%  | 0%  |
| 13 | 82100<br>930  | 82501<br>611  | 400682       | 9       | q31.1  | q31.1  | SLITRK1                      | 7%  | 11% | 3%  | 6%  | 0%  |
| 14 | 33546<br>537  | 33860<br>837  | 314301       | 3       | q13.2  | q13.2  | C14orf10                     | 3%  | 2%  | 0%  | 2%  | 17% |
| 14 | 39940<br>055  | 39940<br>055  | 1            | 1       | q21.1  | q21.1  | LRFN5                        | 3%  | 2%  | 0%  | 2%  | 17% |
| 14 | 41642<br>809  | 41949<br>251  | 306443       | 9       | q21.2  | q21.2  | DKFZP434F<br>1017/LRFN<br>5  | 3%  | 4%  | 0%  | 2%  | 17% |
| 14 | 56193<br>192  | 67045<br>840  | 1085264<br>9 | 26<br>8 | q23.1  | q24.1  | /C14orf105                   | 6%  | 7%  | 3%  | 4%  | 17% |
| 14 | 67748<br>303  | 67855<br>322  | 107020       | 3       | q24.1  | q24.1  | GALNTL1                      | 3%  | 1%  | 0%  | 4%  | 17% |
| 14 | 68405<br>286  | 70904<br>846  | 2499561      | 42      | q24.2  | q24.2  | SMOC1                        | 4%  | 2%  | 3%  | 4%  | 17% |
| 14 | 71323<br>712  | 72753<br>412  | 1429701      | 30      | q24.2  | q24.3  | DPF3                         | 5%  | 5%  | 3%  | 4%  | 17% |
| 14 | 73257<br>459  | 73316<br>456  | 58998        | 7       | q24.3  | q24.3  | C14orf170                    | 3%  | 2%  | 0%  | 4%  | 17% |
| 14 | 74159<br>349  | 74510<br>410  | 351062       | 6       | q24.3  | q24.3  | NA                           | 3%  | 2%  | 0%  | 4%  | 17% |
| 14 | 75138<br>528  | 75572<br>524  | 433997       | 6       | q24.3  | q24.3  | ESRRB/KIA<br>A1036           | 6%  | 5%  | 6%  | 4%  | 17% |
| 14 | 76275<br>955  | 78845<br>222  | 2569268      | 79      | q24.3  | q31.1  | ADCK1                        | 4%  | 4%  | 3%  | 4%  | 17% |
| 14 | 79549<br>006  | 79549<br>006  | 1            | 1       | q31.1  | q31.1  | TSHR                         | 3%  | 2%  | 0%  | 4%  | 17% |
| 14 | 80078<br>633  | 85372<br>109  | 5293477      | 18<br>6 | q31.1  | q31.3  | /SEL1L                       | 6%  | 6%  | 3%  | 4%  | 17% |
| 14 | 85731<br>066  | 87798<br>781  | 2067716      | 52      | q31.3  | q32.11 | GALC                         | 5%  | 5%  | 3%  | 4%  | 17% |
| 14 | 87934<br>790  | 92428<br>523  | 4493734      | 85      | q32.11 | q32.12 | C14orf116                    | 4%  | 4%  | 3%  | 2%  | 17% |
| 14 | 96232<br>984  | 96232<br>984  | 1            | 1       | q32.2  | q32.2  | FLJ25773                     | 3%  | 4%  | 0%  | 2%  | 17% |
| 14 | 97944<br>125  | 97944<br>125  | 1            | 1       | q32.2  | q32.2  | CCNK                         | 3%  | 2%  | 0%  | 2%  | 17% |
| 14 | 10086<br>5241 | 10184<br>7578 | 982338       | 5       | q32.32 | q32.32 | NA                           | 6%  | 6%  | 3%  | 6%  | 17% |
| 15 | 19848<br>871  | 19939<br>343  | 90473        | 5       | q11.2  | q11.2  | NA                           | 21% | 24% | 18% | 15% | 25% |
| 15 | 32250<br>036  | 32250<br>036  | 1            | 1       | q14    | q14    | SLC12A6                      | 8%  | 13% | 3%  | 2%  | 17% |
| 15 | 42440<br>343  | 42538<br>830  | 98488        | 4       | q15.3  | q15.3  | HSPC129                      | 7%  | 7%  | 9%  | 2%  | 17% |
| 15 | 47355<br>524  | 47355<br>524  | 1            | 1       | q21.1  | q21.1  | FLJ32800                     | 15% | 15% | 18% | 10% | 25% |
| 15 | 54452<br>264  | 54452<br>534  | 271          | 3       | q21.3  | q21.3  | MNS1                         | 6%  | 7%  | 6%  | 2%  | 17% |
| 15 | 57426<br>793  | 57427<br>747  | 955          | 3       | q22.2  | q22.2  | /MYO1E/L<br>DHL/MGC2<br>6690 | 7%  | 11% | 6%  | 2%  | 8%  |
| 15 | 78299<br>749  | 78343<br>727  | 43979        | 2       | q25.1  | q25.1  | FAH/ARNT<br>2                | 8%  | 9%  | 9%  | 2%  | 25% |
| 16 | 41983<br>30   | 42152<br>97   | 16968        | 2       | p13.3  | p13.3  | SRL/ADCY<br>9                | 4%  | 4%  | 12% | 2%  | 0%  |
| 16 | 11274<br>531  | 11274<br>531  | 1            | 1       | p13.13 | p13.13 | SOCS1                        | 11% | 11% | 6%  | 12% | 17% |

|    |              |              |         |    |        |        |                               |     |     |     |     |     |
|----|--------------|--------------|---------|----|--------|--------|-------------------------------|-----|-----|-----|-----|-----|
| 16 | 17315<br>856 | 17315<br>856 | 1       | 1  | p12.3  | p12.3  | XYLT1                         | 4%  | 4%  | 12% | 0%  | 0%  |
| 16 | 29175<br>680 | 29175<br>680 | 1       | 1  | p11.2  | p11.2  | NA                            | 7%  | 7%  | 3%  | 12% | 0%  |
| 16 | 48315<br>382 | 48441<br>975 | 126594  | 2  | q12.1  | q12.1  | SIAH1/FLJ3<br>1821            | 4%  | 4%  | 12% | 0%  | 0%  |
| 16 | 52690<br>211 | 52690<br>211 | 1       | 1  | q12.2  | q12.2  | NA                            | 4%  | 4%  | 12% | 0%  | 0%  |
| 17 | 29639<br>556 | 29785<br>153 | 145598  | 2  | q11.2  | q11.2  | NF1                           | 14% | 17% | 12% | 13% | 0%  |
| 17 | 35324<br>872 | 35324<br>872 | 1       | 1  | q12    | q12    | LHX1/FLJ2<br>2578             | 9%  | 9%  | 12% | 8%  | 8%  |
| 17 | 44840<br>245 | 44843<br>820 | 3576    | 2  | q21.31 | q21.31 | NBR2                          | 11% | 9%  | 15% | 12% | 8%  |
| 17 | 58050<br>451 | 58050<br>451 | 1       | 1  | q23.2  | q23.2  | DHX40/FLJ<br>37451            | 9%  | 9%  | 9%  | 12% | 0%  |
| 17 | 63045<br>110 | 63091<br>410 | 46301   | 2  | q24.1  | q24.1  | LOC90799/<br>SMURF2           | 15% | 17% | 9%  | 17% | 8%  |
| 18 | 12792<br>416 | 12792<br>416 | 1       | 1  | p11.21 | p11.21 | PTPN2                         | 19% | 18% | 18% | 23% | 8%  |
| 18 | 31861<br>040 | 31861<br>040 | 1       | 1  | q12.2  | q12.2  | P15RS                         | 12% | 12% | 21% | 10% | 8%  |
| 18 | 57740<br>362 | 57740<br>362 | 1       | 1  | q21.33 | q21.33 | PIGN                          | 13% | 12% | 9%  | 17% | 17% |
| 18 | 74985<br>678 | 74985<br>678 | 1       | 1  | q23    | q23    | NA                            | 7%  | 6%  | 3%  | 12% | 17% |
| 19 | 71339<br>63  | 71339<br>63  | 1       | 1  | p13.2  | p13.2  | INSR                          | 7%  | 4%  | 6%  | 13% | 8%  |
| 19 | 14900<br>519 | 14900<br>616 | 98      | 2  | p13.12 | p13.12 | /OR7A17                       | 13% | 4%  | 12% | 31% | 17% |
| 19 | 16012<br>223 | 16012<br>223 | 1       | 1  | p13.12 | p13.12 | FLJ25328                      | 6%  | 0%  | 3%  | 15% | 17% |
| 19 | 19682<br>367 | 19682<br>367 | 1       | 1  | p13.11 | p13.11 | ZNF14                         | 38% | 30% | 30% | 50% | 50% |
| 19 | 32615<br>675 | 32787<br>652 | 171978  | 4  | q12    | q12    | ZNF539/UQ<br>CRFS1            | 14% | 5%  | 9%  | 33% | 17% |
| 19 | 38087<br>312 | 38087<br>312 | 1       | 1  | q13.11 | q13.11 | FLJ14640                      | 32% | 17% | 27% | 58% | 42% |
| 19 | 46477<br>122 | 48422<br>858 | 1945737 | 7  | q13.2  | q13.31 | CEACAM5                       | 8%  | 7%  | 9%  | 27% | 17% |
| 19 | 55203<br>845 | 55242<br>623 | 38779   | 2  | q13.33 | q13.33 | ZNF473                        | 22% | 9%  | 21% | 44% | 33% |
| 19 | 57117<br>898 | 57848<br>908 | 731011  | 10 | q13.41 | q13.41 | FLJ12644/Z<br>NF613           | 31% | 16% | 24% | 56% | 50% |
| 19 | 59864<br>390 | 61780<br>662 | 1916273 | 14 | q13.42 | q13.43 | ZNF495/ZN<br>F582             | 21% | 6%  | 18% | 46% | 33% |
| 20 | 30650<br>914 | 30650<br>914 | 1       | 1  | q11.21 | q11.21 | DEFB118                       | 13% | 9%  | 12% | 19% | 33% |
| 21 | 99290<br>29  | 10019<br>847 | 90819   | 3  | p11.2  | p11.2  | TPTE                          | 13% | 16% | 12% | 13% | 0%  |
| 22 | 15876<br>534 | 15924<br>972 | 48439   | 2  | q11.1  | q11.1  | IL17R/MGC<br>57211            | 8%  | 7%  | 12% | 10% | 0%  |
| 22 | 23025<br>408 | 23025<br>408 | 1       | 1  | q11.23 | q11.23 | KIAA0376/<br>DKFZP434P<br>211 | 11% | 13% | 15% | 8%  | 0%  |

**Table S4:** List of regions found amplified more than 5-fold in more than 10% of the samples assayed (by histopathological group).

| Chr | Start bp      | End bp        | Length (bp) | SNP # | Starting Band | Ending Band | Gene(s)             | All | GBM | ASTRO | OLIGO | MIXED |
|-----|---------------|---------------|-------------|-------|---------------|-------------|---------------------|-----|-----|-------|-------|-------|
|     |               |               |             |       |               |             |                     | max | max | max   | max   | max   |
| 1   | 21036<br>64   | 21036<br>64   | 1           | 1     | p36.33        | p36.33      | SKI                 | 29% | 29% | 30%   | 27%   | 33%   |
| 1   | 11896<br>676  | 12518<br>724  | 622049      | 2     | p36.22        | p36.21      | TNFRSF8             | 28% | 38% | 30%   | 13%   | 50%   |
| 1   | 31617<br>266  | 31617<br>266  | 1           | 1     | p35.2         | p35.2       | COL6A1              | 3%  | 5%  | 0%    | 0%    | 17%   |
| 1   | 19824<br>5289 | 19824<br>5289 | 1           | 1     | q32.1         | q32.1       | KIF21B              | 28% | 37% | 15%   | 23%   | 17%   |
| 1   | 20287<br>1796 | 20287<br>1796 | 1           | 1     | q32.1         | q32.1       | NUCKS               | 30% | 28% | 33%   | 35%   | 25%   |
| 2   | 27570<br>291  | 27570<br>291  | 1           | 1     | p23.3         | p23.3       | SNX17               | 53% | 60% | 45%   | 46%   | 58%   |
| 2   | 12922<br>4881 | 12927<br>7433 | 52553       | 2     | q14.3         | q14.3       | HS6ST1/RA<br>B6C    | 15% | 12% | 15%   | 21%   | 17%   |
| 3   | 50240<br>180  | 50346<br>522  | 106343      | 2     | p21.31        | p21.31      | GNAI2               | 11% | 7%  | 9%    | 19%   | 8%    |
| 4   | 64956<br>55   | 64956<br>55   | 1           | 1     | p16.1         | p16.1       | PPP2R2C             | 37% | 30% | 45%   | 44%   | 25%   |
| 4   | 86989<br>35   | 86989<br>35   | 1           | 1     | p16.1         | p16.1       | GPR78               | 25% | 20% | 33%   | 29%   | 25%   |
| 7   | 22641<br>47   | 23525<br>07   | 88361       | 3     | p22.3         | p22.3       | KIAA1023            | 21% | 33% | 9%    | 10%   | 17%   |
| 7   | 47520<br>749  | 47546<br>857  | 26109       | 2     | p12.3         | p12.3       | HUS1                | 17% | 23% | 3%    | 15%   | 33%   |
| 7   | 51034<br>796  | 51034<br>796  | 1           | 1     | p12.1         | p12.1       | COBL                | 20% | 30% | 9%    | 8%    | 25%   |
| 7   | 54151<br>805  | 55235<br>757  | 1083953     | 32    | p11.2         | p11.2       | EGFR                | 26% | 43% | 15%   | 6%    | 33%   |
| 7   | 54460<br>074  | 55235<br>757  | 775684      | 17    | p11.2         | p11.2       | SEC61G/M<br>GC33530 | 26% | 43% | 15%   | 6%    | 33%   |
| 7   | 64650<br>310  | 64681<br>600  | 31291       | 2     | q11.21        | q11.21      | ZNF92               | 16% | 26% | 9%    | 4%    | 17%   |
| 7   | 67935<br>503  | 67935<br>503  | 1           | 1     | q11.22        | q11.22      | AUTS2/FLJ<br>13195  | 12% | 13% | 12%   | 13%   | 8%    |
| 7   | 98194<br>545  | 98404<br>785  | 210241      | 4     | q22.1         | q22.1       | TRRAP/SM<br>URF1    | 66% | 72% | 64%   | 62%   | 58%   |
| 7   | 99825<br>884  | 99825<br>884  | 1           | 1     | q22.1         | q22.1       | TFR2/MOS<br>PD3     | 10% | 9%  | 12%   | 12%   | 17%   |
| 7   | 15242<br>1842 | 15242<br>3082 | 1241        | 2     | q36.2         | q36.2       | DPP6/ARP3<br>BETA   | 34% | 41% | 27%   | 27%   | 42%   |
| 7   | 15541<br>3449 | 15541<br>3449 | 1           | 1     | q36.3         | q36.3       | SHH/C7orf1<br>3     | 15% | 18% | 9%    | 10%   | 25%   |
| 8   | 12029<br>748  | 12029<br>748  | 1           | 1     | p23.1         | p23.1       | MGC16279            | 8%  | 13% | 6%    | 2%    | 0%    |
| 8   | 14294<br>2385 | 14294<br>2385 | 1           | 1     | q24.3         | q24.3       | PTP4A3              | 32% | 35% | 27%   | 29%   | 33%   |
| 9   | 12717<br>5184 | 12717<br>5184 | 1           | 1     | q34.11        | q34.11      | C9orf54             | 14% | 18% | 12%   | 8%    | 17%   |
| 10  | 74884<br>415  | 74884<br>415  | 1           | 1     | q22.2         | q22.2       | SEC24C              | 3%  | 0%  | 0%    | 10%   | 0%    |
| 10  | 80242<br>907  | 80242<br>907  | 1           | 1     | q22.3         | q22.3       | RPS24/RAI1<br>7     | 12% | 4%  | 12%   | 27%   | 17%   |
| 10  | 13090<br>1969 | 13090<br>2117 | 149         | 2     | q26.3         | q26.3       | MGMT                | 10% | 6%  | 9%    | 19%   | 8%    |



|    |               |               |         |   |        |        |                        |     |     |     |     |     |
|----|---------------|---------------|---------|---|--------|--------|------------------------|-----|-----|-----|-----|-----|
| 11 | 29493<br>82   | 29647<br>04   | 15323   | 2 | p15.4  | p15.4  | NAP1L4                 | 13% | 15% | 12% | 13% | 8%  |
| 12 | 33057<br>91   | 33311<br>40   | 25350   | 2 | p13.32 | p13.32 | HRMT1L3/<br>PP1057     | 3%  | 0%  | 3%  | 4%  | 17% |
| 13 | 10915<br>9218 | 10915<br>9218 | 1       | 1 | q34    | q34    | ING1                   | 9%  | 7%  | 9%  | 13% | 0%  |
| 14 | 10337<br>6060 | 10473<br>3584 | 1357525 | 2 | q32.33 | q32.33 | C14orf78               | 10% | 9%  | 12% | 10% | 8%  |
| 16 | 45589<br>08   | 45589<br>08   | 1       | 1 | p13.3  | p13.3  | HMOX2                  | 13% | 13% | 15% | 10% | 17% |
| 16 | 17315<br>856  | 17315<br>856  | 1       | 1 | p12.3  | p12.3  | XYLT1                  | 6%  | 4%  | 3%  | 12% | 0%  |
| 17 | 38633<br>209  | 38633<br>209  | 1       | 1 | q21.1  | q21.1  | THRA                   | 34% | 45% | 21% | 27% | 25% |
| 17 | 77161<br>434  | 77161<br>434  | 1       | 1 | q25.3  | q25.3  | FLJ40457               | 20% | 16% | 21% | 29% | 17% |
| 19 | 27055<br>48   | 27058<br>40   | 293     | 2 | p13.3  | p13.3  | GNA11                  | 22% | 29% | 12% | 13% | 42% |
| 19 | 76874<br>35   | 76874<br>35   | 1       | 1 | p13.2  | p13.2  | FCER2                  | 7%  | 11% | 3%  | 2%  | 8%  |
| 19 | 14490<br>150  | 14510<br>264  | 20115   | 2 | p13.12 | p13.12 | DNAJB1                 | 15% | 18% | 15% | 10% | 8%  |
| 20 | 69663<br>1    | 69663<br>1    | 1       | 1 | p13    | p13    | C20orf55               | 11% | 20% | 6%  | 2%  | 0%  |
| 20 | 11956<br>243  | 11974<br>195  | 17953   | 3 | p12.1  | p12.1  | BTBD3/C20<br>orf38     | 10% | 18% | 3%  | 4%  | 0%  |
| 20 | 31956<br>735  | 32148<br>866  | 192132  | 3 | q11.21 | q11.21 | C20orf112/F<br>LJ33706 | 21% | 30% | 9%  | 13% | 25% |
| 20 | 33753<br>012  | 33753<br>012  | 1       | 1 | q11.22 | q11.22 | ITCH                   | 6%  | 11% | 0%  | 0%  | 8%  |
| 20 | 43969<br>564  | 43969<br>564  | 1       | 1 | q13.12 | q13.12 | ADA                    | 19% | 32% | 6%  | 6%  | 25% |
| 20 | 46975<br>672  | 47162<br>057  | 186386  | 2 | q13.12 | q13.13 | SULF2/PRE<br>X1        | 16% | 26% | 3%  | 10% | 17% |
| 20 | 49523<br>283  | 49523<br>283  | 1       | 1 | q13.13 | q13.13 | PTPN1                  | 10% | 18% | 6%  | 0%  | 8%  |

**Table S5:** List of regions found with Loss of heterozygosity in more than 5% of the samples assayed (by histopathological group).

| Chr | Start bp      | End bp        | Start Band | End Band | Length (bp)  | SNP # | Gene                                                                                                                                                                      | All max | GBM max | ASTRO max | OLIGO max | MIXED max |
|-----|---------------|---------------|------------|----------|--------------|-------|---------------------------------------------------------------------------------------------------------------------------------------------------------------------------|---------|---------|-----------|-----------|-----------|
| 1   | 27085<br>22   | 42571<br>804  | p36.32     | p34.2    | 398632<br>83 | 429   | BACH/CAMTA1/<br>CLSTN1/CTNNA1/<br>P1/DHRS3/FBXO<br>2/FLJ20321/FLJ37<br>118/FRAP1/KIF1<br>B/MFN2/MGC351<br>94/MIG6/PEX14/<br>PGD/RERE/TNFR<br>SF1B/TNFRSF9/<br>UTS2/VPS13D | 7%      | 4%      | 0%        | 21%       | 0%        |
| 1   | 44362<br>823  | 44844<br>958  | p34.1      | p34.1    | 482136       | 7     | EIF2B3/FLJ10597                                                                                                                                                           | 5%      | 0%      | 0%        | 17%       | 0%        |
| 1   | 45088<br>414  | 46487<br>861  | p34.1      | p33      | 139944<br>8  | 14    | ATPAF1/DMBX1<br>/FLJ32011/MAST<br>2/MGC22960/PIK<br>3R3/TESK2/ZSWI<br>M5                                                                                                  | 5%      | 0%      | 0%        | 17%       | 0%        |
| 1   | 47632<br>536  | 59955<br>439  | p33        | p32.1    | 123229<br>04 | 263   | DAB1                                                                                                                                                                      | 8%      | 2%      | 0%        | 23%       | 0%        |
| 1   | 60259<br>591  | 60488<br>848  | p32.1      | p32.1    | 229258       | 5     | MGC34837/NFIA                                                                                                                                                             | 5%      | 1%      | 0%        | 15%       | 0%        |
| 1   | 60538<br>781  | 61216<br>850  | p32.1      | p31.3    | 678070       | 16    | MGC34837/NFIA                                                                                                                                                             | 5%      | 1%      | 0%        | 15%       | 0%        |
| 1   | 61535<br>053  | 67455<br>635  | p31.3      | p31.2    | 592058<br>3  | 150   | AK3/JAK1/KIAA<br>1573/LEPR/MGC<br>35130                                                                                                                                   | 8%      | 1%      | 0%        | 25%       | 9%        |
| 1   | 69793<br>578  | 70178<br>184  | p31.1      | p31.1    | 384607       | 16    | DKFZP566D1346/<br>FLJ20331/KIAA1<br>365/SFRS11                                                                                                                            | 6%      | 0%      | 0%        | 19%       | 0%        |
| 1   | 78951<br>103  | 80600<br>999  | p31.1      | p31.1    | 164989<br>7  | 77    | LPHN2                                                                                                                                                                     | 9%      | 6%      | 0%        | 21%       | 0%        |
| 1   | 82264<br>426  | 93650<br>713  | p31.1      | p22.1    | 113862<br>88 | 319   | COL24A1/KIAA1<br>229                                                                                                                                                      | 8%      | 1%      | 3%        | 25%       | 9%        |
| 1   | 93803<br>279  | 93857<br>392  | p22.1      | p22.1    | 54114        | 5     | ABCA4/BCAR3/<br>GCLM/HSU15552                                                                                                                                             | 5%      | 0%      | 0%        | 15%       | 9%        |
| 1   | 94801<br>236  | 94899<br>852  | p21.3      | p21.3    | 98617        | 4     | CNN3/MGC45474                                                                                                                                                             | 5%      | 1%      | 0%        | 15%       | 0%        |
| 1   | 95105<br>778  | 10665<br>7077 | p21.3      | p13.3    | 115513<br>00 | 284   | DPYD/PTBP2                                                                                                                                                                | 10%     | 2%      | 0%        | 29%       | 9%        |
| 1   | 10780<br>4051 | 11212<br>5912 | p13.3      | p13.2    | 432186<br>2  | 126   | AHCYL1/CD53/C<br>SF1/EP8L3/GPR<br>61/KCNA2/KCN<br>A3/KCNC4/LOC1<br>64153/MGC46534<br>/MGC54289/PSM<br>A5/RIF1/SLC16A<br>4/SORT1                                           | 6%      | 1%      | 0%        | 21%       | 0%        |
| 1   | 11321<br>8181 | 11828<br>2702 | p13.2      | p12      | 506452<br>2  | 109   | NGFB/TSPAN-2                                                                                                                                                              | 6%      | 1%      | 0%        | 17%       | 9%        |
| 2   | 19325<br>1438 | 19652<br>9342 | q32.3      | q32.3    | 327790<br>5  | 65    | TMEFF2                                                                                                                                                                    | 6%      | 9%      | 6%        | 6%        | 0%        |
| 2   | 19699         | 19699         | q32.3      | q32.3    | 1            | 1     | DNAH7                                                                                                                                                                     | 5%      | 5%      | 9%        | 4%        | 0%        |

|    |               |               |        |        |               |      |                                                                                     |     |     |     |     |     |  |  |
|----|---------------|---------------|--------|--------|---------------|------|-------------------------------------------------------------------------------------|-----|-----|-----|-----|-----|--|--|
|    | 5117          | 5117          |        |        |               |      |                                                                                     |     |     |     |     |     |  |  |
| 3  | 13004<br>6939 | 13269<br>6233 | q21.3  | q22.1  | 264929<br>5   | 45   | ATP2C1/CPNE4/<br>FLJ12057/FLJ358<br>80/HT001/LOC13<br>2241/NEK11/PIK<br>3R4/RHO/TRH | 5%  | 4%  | 9%  | 2%  | 18% |  |  |
| 6  | 26557<br>415  | 29444<br>173  | p22.1  | p22.1  | 288675<br>9   | 33   | GPX5/OR5V1/RF<br>P/ZNF311/ZNF45<br>2                                                | 6%  | 7%  | 3%  | 4%  | 9%  |  |  |
| 6  | 51058<br>383  | 51112<br>593  | p12.3  | p12.3  | 54211         | 3    | PKHD1/TFAP2B                                                                        | 5%  | 7%  | 6%  | 2%  | 0%  |  |  |
| 6  | 62856<br>649  | 63238<br>120  | q11.1  | q11.1  | 381472        | 16   | GLULD1/KHDRB<br>S2                                                                  | 6%  | 5%  | 9%  | 6%  | 0%  |  |  |
| 6  | 79852<br>226  | 80133<br>067  | q14.1  | q14.1  | 280842        | 13   | C6orf152/HMGN3<br>/PHIP                                                             | 5%  | 6%  | 9%  | 2%  | 0%  |  |  |
| 7  | 85177<br>902  | 85746<br>055  | q21.11 | q21.11 | 568154        | 22   | GRM3                                                                                | 5%  | 4%  | 3%  | 8%  | 9%  |  |  |
| 7  | 86236<br>120  | 86657<br>613  | q21.12 | q21.12 | 421494        | 11   | ABCB4/C7orf23/<br>CROT/DMTF1/FL<br>J31340/TP53AP1                                   | 5%  | 5%  | 6%  | 4%  | 9%  |  |  |
| 7  | 11788<br>8833 | 11929<br>8514 | q31.31 | q31.31 | 140968<br>2   | 31   | KCND2                                                                               | 6%  | 4%  | 9%  | 6%  | 9%  |  |  |
| 7  | 12526<br>7226 | 12625<br>2244 | q31.33 | q31.33 | 985019        | 59   | GRM8                                                                                | 9%  | 6%  | 24% | 4%  | 9%  |  |  |
| 8  | 50094<br>612  | 52299<br>279  | q11.21 | q11.22 | 220466<br>8   | 73   | SNTG1                                                                               | 9%  | 7%  | 9%  | 10% | 18% |  |  |
| 9  | 23939<br>1    | 32506<br>864  | p24.3  | p21.1  | 322674<br>74  | 1159 | MPDZ/NFIB/CD<br>KN2A                                                                | 17% | 28% | 6%  | 13% | 27% |  |  |
| 10 | 22369<br>5    | 13481<br>3136 | p15.3  | q26.3  | 134589<br>442 | 2941 | IMPK/TFAM/ZW<br>INT/PTEN                                                            | 21% | 28% | 27% | 10% | 27% |  |  |
| 11 | 11705<br>272  | 13459<br>073  | p15.3  | p15.3  | 175380<br>2   | 46   | ARNTL/FLJ14966<br>/MGC71806/MIC<br>AL2/PARVA/PTH<br>/TEAD1                          | 5%  | 6%  | 6%  | 2%  | 9%  |  |  |
| 11 | 38225<br>627  | 38349<br>147  | p12    | p12    | 123521        | 6    | LOC119710/RAG<br>1/RAG2                                                             | 5%  | 5%  | 6%  | 4%  | 9%  |  |  |
| 11 | 40321<br>385  | 40321<br>562  | p12    | p12    | 178           | 2    | API5                                                                                | 5%  | 5%  | 9%  | 4%  | 0%  |  |  |
| 11 | 10457<br>5201 | 10582<br>6061 | q22.3  | q22.3  | 125086<br>1   | 36   | GRIA4/GUCY1A<br>2/KBTBD3                                                            | 5%  | 6%  | 9%  | 4%  | 0%  |  |  |
| 12 | 41763<br>838  | 41849<br>394  | q12    | q12    | 85557         | 10   | ADAMTS20                                                                            | 5%  | 5%  | 9%  | 4%  | 0%  |  |  |
| 12 | 42326<br>335  | 43025<br>660  | q12    | q12    | 699326        | 15   | ADAMTS20/DKF<br>Zp434K2435                                                          | 5%  | 5%  | 12% | 2%  | 0%  |  |  |
| 12 | 43291<br>091  | 43291<br>091  | q12    | q12    | 1             | 1    | NELL2                                                                               | 5%  | 5%  | 15% | 0%  | 0%  |  |  |
| 13 | 39835<br>935  | 40118<br>827  | q14.11 | q14.11 | 282893        | 6    | KIAA0564/RGC3<br>2                                                                  | 5%  | 9%  | 3%  | 2%  | 0%  |  |  |
| 13 | 40194<br>618  | 44916<br>652  | q14.11 | q14.13 | 472203<br>5   | 144  | DNAJD1                                                                              | 8%  | 12% | 9%  | 2%  | 0%  |  |  |
| 13 | 45253<br>864  | 45899<br>437  | q14.2  | q14.2  | 645574        | 20   | HTR2A/SUCLA2                                                                        | 6%  | 10% | 3%  | 2%  | 0%  |  |  |
| 13 | 46029<br>992  | 50091<br>533  | q14.2  | q14.3  | 406154<br>2   | 70   | DLEU1/FAM10A<br>4/FLJ11712/HTR2<br>A/SUCLA2                                         | 6%  | 10% | 3%  | 4%  | 0%  |  |  |
| 13 | 51288<br>882  | 51550<br>182  | q14.3  | q14.3  | 261301        | 11   | FLJ40296/GW112<br>/PCDH8                                                            | 5%  | 7%  | 3%  | 4%  | 0%  |  |  |
| 13 | 55615<br>870  | 57296<br>330  | q21.1  | q21.1  | 168046<br>1   | 33   | FLJ40296/PCDH1<br>7                                                                 | 6%  | 10% | 3%  | 4%  | 0%  |  |  |
| 13 | 60232         | 62887         | q21.31 | q21.31 | 265486        | 57   | FLJ25694/PCDH2                                                                      | 6%  | 11% | 0%  | 2%  | 0%  |  |  |

|    |              |              |        |        |             |     |                                                                                                      |     |     |    |     |     |
|----|--------------|--------------|--------|--------|-------------|-----|------------------------------------------------------------------------------------------------------|-----|-----|----|-----|-----|
|    | 602          | 470          |        |        | 9           |     | 0                                                                                                    |     |     |    |     |     |
| 13 | 62906<br>541 | 65139<br>738 | q21.31 | q21.32 | 223319<br>8 | 67  | FLJ25694/PCDH9                                                                                       | 6%  | 11% | 0% | 2%  | 9%  |
| 13 | 65324<br>482 | 68494<br>518 | q21.32 | q21.33 | 317003<br>7 | 92  | KLHL1/PCDH9                                                                                          | 6%  | 11% | 3% | 2%  | 9%  |
| 13 | 68495<br>298 | 68900<br>530 | q21.33 | q21.33 | 405233      | 8   | DACH1/KLHL1                                                                                          | 5%  | 9%  | 3% | 2%  | 0%  |
| 13 | 69747<br>534 | 70337<br>628 | q21.33 | q21.33 | 590095      | 23  | DACH1/KLHL1                                                                                          | 6%  | 10% | 0% | 2%  | 9%  |
| 13 | 70342<br>102 | 70674<br>359 | q21.33 | q21.33 | 332258      | 11  | DACH1/FLJ22624<br>/KIAA1008                                                                          | 6%  | 10% | 0% | 2%  | 9%  |
| 13 | 70994<br>914 | 71594<br>104 | q21.33 | q22.1  | 599191      | 15  | C13orf24/DACH1<br>/FLJ22624/KIAA1<br>008/KLF12/KLF5                                                  | 5%  | 9%  | 0% | 2%  | 9%  |
| 13 | 72545<br>884 | 73450<br>513 | q22.1  | q22.2  | 904630      | 27  |                                                                                                      | 5%  | 10% | 0% | 2%  | 0%  |
| 13 | 73470<br>543 | 74032<br>226 | q22.2  | q22.2  | 561684      | 23  | LMO7/UCHL3                                                                                           | 5%  | 10% | 0% | 2%  | 0%  |
| 13 | 86740<br>749 | 87764<br>104 | q31.2  | q31.3  | 102335<br>6 | 28  | SLITRK5                                                                                              | 6%  | 10% | 3% | 2%  | 0%  |
| 14 | 25413<br>972 | 26047<br>168 | q12    | q12    | 633197      | 19  | NOVA1                                                                                                | 5%  | 9%  | 0% | 2%  | 9%  |
| 14 | 28480<br>401 | 28664<br>599 | q12    | q12    | 184199      | 13  | PRKCM                                                                                                | 5%  | 10% | 0% | 2%  | 0%  |
| 14 | 28664<br>937 | 31221<br>626 | q12    | q12    | 255669<br>0 | 78  | AKAP6/ARHGAP<br>5/C14orf127                                                                          | 6%  | 10% | 0% | 2%  | 9%  |
| 14 | 35301<br>567 | 35504<br>514 | q13.3  | q13.3  | 202948      | 10  | SLC25A21                                                                                             | 5%  | 10% | 3% | 0%  | 0%  |
| 14 | 36567<br>572 | 38128<br>935 | q21.1  | q21.1  | 156136<br>4 | 44  | C14orf27/SEC23A                                                                                      | 6%  | 11% | 3% | 2%  | 0%  |
| 14 | 38173<br>324 | 38476<br>383 | q21.1  | q21.1  | 303060      | 16  | LRFN5                                                                                                | 5%  | 10% | 0% | 2%  | 0%  |
| 14 | 42299<br>753 | 42497<br>693 | q21.2  | q21.2  | 197941      | 5   | DKFZP434F1017/<br>LRFN5                                                                              | 5%  | 9%  | 0% | 2%  | 9%  |
| 14 | 42605<br>687 | 45480<br>533 | q21.2  | q21.3  | 287484<br>7 | 74  | C14orf106/DKFZ<br>P434F1017/FKBP<br>3/KIAA1596/RPL<br>10L                                            | 7%  | 10% | 0% | 6%  | 9%  |
| 14 | 47309<br>465 | 51206<br>761 | q21.3  | q22.1  | 389729<br>7 | 79  | DKFZp762F0713/<br>ERO1L                                                                              | 6%  | 9%  | 0% | 4%  | 9%  |
| 14 | 56162<br>111 | 60644<br>739 | q23.1  | q23.2  | 448262<br>9 | 116 | C14orf135/C14orf<br>39/DHRS7/HIF1A<br>/KIAA1393/MNA<br>T1/PPM1A/PRKC<br>H/RTN1/SIX1/SI<br>X6/SLC38A6 | 9%  | 10% | 3% | 10% | 18% |
| 14 | 60727<br>775 | 60817<br>381 | q23.2  | q23.2  | 89607       | 8   | KCNH5                                                                                                | 6%  | 7%  | 0% | 4%  | 18% |
| 14 | 61073<br>472 | 68525<br>940 | q23.2  | q24.2  | 745246<br>9 | 129 | FUT8                                                                                                 | 10% | 15% | 0% | 10% | 18% |
| 14 | 68634<br>783 | 70819<br>116 | q24.2  | q24.2  | 218433<br>4 | 49  | C14orf112/MAP3<br>K9/MED6/PCNX/<br>RGS6/SLC8A3/T<br>TC9                                              | 6%  | 7%  | 3% | 6%  | 9%  |
| 14 | 70821<br>047 | 75244<br>140 | q24.2  | q24.3  | 442309<br>4 | 56  | DPF3/NUMB/PSE<br>N1                                                                                  | 6%  | 7%  | 3% | 6%  | 9%  |
| 14 | 77982<br>153 | 78083<br>295 | q31.1  | q31.1  | 101143      | 12  | NRXN3                                                                                                | 5%  | 6%  | 0% | 4%  | 18% |
| 14 | 78112<br>876 | 81367<br>373 | q31.1  | q31.2  | 325449<br>8 | 127 | TSHR                                                                                                 | 6%  | 6%  | 0% | 8%  | 18% |

|    |              |              |        |        |              |     |                                                                                                                                                                                                                                                                                                                                                                                                                                                                                                                                                                                                                                                                                 |     |     |     |     |     |
|----|--------------|--------------|--------|--------|--------------|-----|---------------------------------------------------------------------------------------------------------------------------------------------------------------------------------------------------------------------------------------------------------------------------------------------------------------------------------------------------------------------------------------------------------------------------------------------------------------------------------------------------------------------------------------------------------------------------------------------------------------------------------------------------------------------------------|-----|-----|-----|-----|-----|
| 14 | 82490<br>390 | 82618<br>092 | q31.3  | q31.3  | 127703       | 6   | SEL1L                                                                                                                                                                                                                                                                                                                                                                                                                                                                                                                                                                                                                                                                           | 5%  | 5%  | 0%  | 8%  | 9%  |
| 14 | 82713<br>267 | 84955<br>240 | q31.3  | q31.3  | 224197<br>4  | 92  | FLRT2/SEL1L                                                                                                                                                                                                                                                                                                                                                                                                                                                                                                                                                                                                                                                                     | 6%  | 7%  | 3%  | 12% | 9%  |
| 15 | 40356<br>051 | 41705<br>574 | q15.1  | q15.3  | 134952<br>4  | 15  | CATSPER2/CKM<br>T1/FLJ35867/LC<br>MT2/MAP1A/TG<br>M7/TP53BP1/UB<br>R1                                                                                                                                                                                                                                                                                                                                                                                                                                                                                                                                                                                                           | 6%  | 6%  | 3%  | 8%  | 0%  |
| 15 | 41939<br>243 | 42919<br>028 | q15.3  | q21.1  | 979786       | 9   | B2M/MGC14161/<br>MGC33951/RNF3<br>6                                                                                                                                                                                                                                                                                                                                                                                                                                                                                                                                                                                                                                             | 5%  | 5%  | 3%  | 8%  | 0%  |
| 15 | 43029<br>735 | 43273<br>374 | q21.1  | q21.1  | 243640       | 3   | MGC33951/SLC2<br>8A2/SORD                                                                                                                                                                                                                                                                                                                                                                                                                                                                                                                                                                                                                                                       | 5%  | 5%  | 3%  | 8%  | 0%  |
| 15 | 43411<br>930 | 43651<br>811 | q21.1  | q21.1  | 239882       | 3   | SPATA5L1/SQR<br>DL                                                                                                                                                                                                                                                                                                                                                                                                                                                                                                                                                                                                                                                              | 5%  | 5%  | 3%  | 8%  | 0%  |
| 15 | 44226<br>985 | 45788<br>188 | q21.1  | q21.1  | 156120<br>4  | 55  | SEMA6D                                                                                                                                                                                                                                                                                                                                                                                                                                                                                                                                                                                                                                                                          | 7%  | 10% | 0%  | 8%  | 0%  |
| 17 | 48920<br>9   | 21095<br>784 | p13.3  | p11.2  | 206065<br>76 | 261 | AIPL1/ALOX12/<br>CGI-<br>125/CLECSF14/F<br>LJ20014/FLJ3273<br>4/MGC10744/MY<br>H10/NDEL1/NTN<br>1/P101-<br>PI3K/PITPNM3/S<br>LC13A5/SLC16A<br>11/TEKT1<br>BIRC8/CACNG6/<br>CACNG8/FPRL2/<br>GALP/KIR3DL1/<br>KLK14/LILRB1/L<br>ILRB4/LOC12620<br>8/NALP11/NALP<br>12/NALP13/NAL<br>P4/NALP5/PPP2R<br>1A/SIGLEC6/SIG<br>LEC8/ZNF160/ZN<br>F175/ZNF331/ZN<br>F444/ZNF534/ZN<br>F577/ZNF578<br>ADRBK2/BCR/C<br>ABIN1/CRYBB2/<br>CRYBB3/DKFZP<br>434P211/FLJ3156<br>8/FLJ36046/GGT1<br>/GGTL4/GSTT2/<br>HS322B1A/IGLJ3<br>/KIAA0376/KIAA<br>1671/LOC150236/<br>LOC91219/MAPK<br>1/MYO18B/PPIL2<br>/PRAME/RUTBC<br>2/SDF2L1/SEZ6L/<br>SLC7A4/SUHW1/<br>SUHW2/TOP3B/<br>UBE2L3/VPREB1 | 11% | 11% | 15% | 8%  | 27% |
| 19 | 33195<br>886 | 63437<br>743 | q12    | q13.43 | 302418<br>58 | 262 | CRYBA4/HPS4/L<br>OC57168/SEZ6L                                                                                                                                                                                                                                                                                                                                                                                                                                                                                                                                                                                                                                                  | 10% | 2%  | 3%  | 25% | 18% |
| 22 | 19773<br>965 | 24801<br>310 | q11.21 | q12.1  | 502734<br>6  | 43  | CRYBA4/PITPNB                                                                                                                                                                                                                                                                                                                                                                                                                                                                                                                                                                                                                                                                   | 5%  | 9%  | 0%  | 4%  | 0%  |
| 22 | 25095<br>430 | 25908<br>845 | q12.1  | q12.1  | 813416       | 18  |                                                                                                                                                                                                                                                                                                                                                                                                                                                                                                                                                                                                                                                                                 | 5%  | 9%  | 3%  | 2%  | 0%  |
| 22 | 25925<br>092 | 26577<br>779 | q12.1  | q12.1  | 652688       | 20  |                                                                                                                                                                                                                                                                                                                                                                                                                                                                                                                                                                                                                                                                                 | 5%  | 9%  | 3%  | 2%  | 0%  |

|    |              |              |       |        |              |    |                                                           |    |     |    |    |    |
|----|--------------|--------------|-------|--------|--------------|----|-----------------------------------------------------------|----|-----|----|----|----|
| 22 | 32295<br>296 | 33464<br>736 | q12.3 | q12.3  | 116944<br>1  | 28 | HMG2L1/LARGE                                              | 5% | 9%  | 0% | 4% | 0% |
| 22 | 33487<br>049 | 44035<br>324 | q12.3 | q13.31 | 105482<br>76 | 77 | APOL3/APOL4/A<br>POL5/HMG2L1/L<br>ARGE/MCM5/M<br>YH9/RBM9 | 7% | 11% | 3% | 4% | 0% |
