# Supplementary material
Source: PubMed Central journal article supplement (PMC4316202)

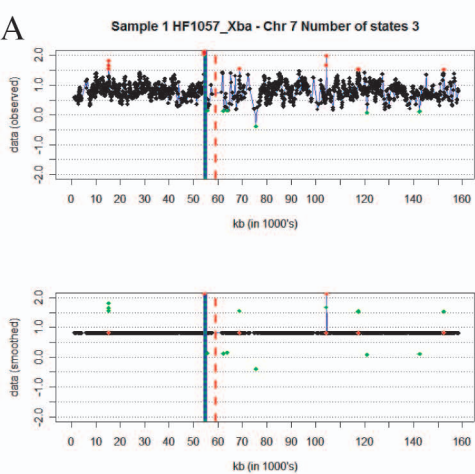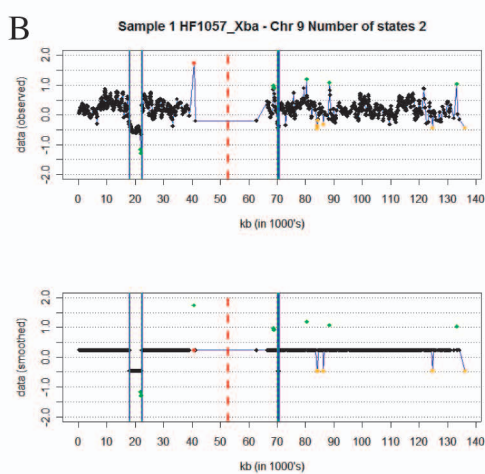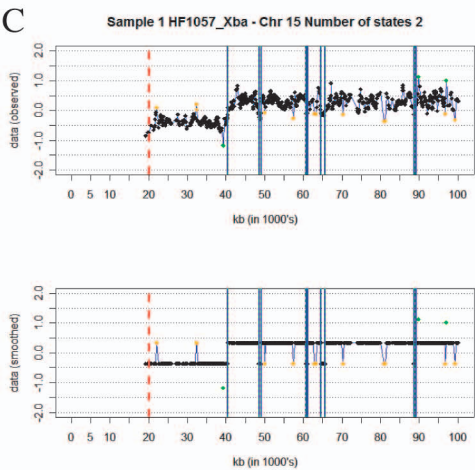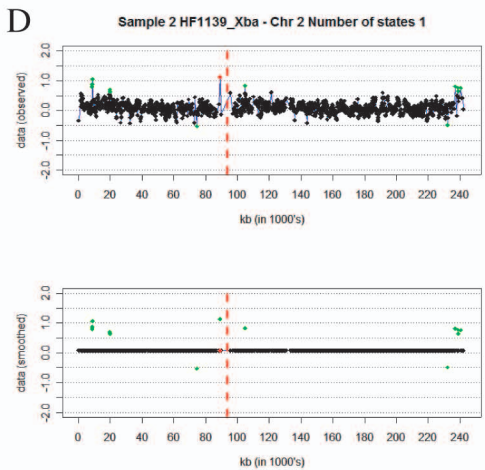

Supplement: NIHMS651039-supplement-Supplementary_Figure_1.pdf [file NIHMS651039-supplement-Supplementary_Figure_1.pdf]

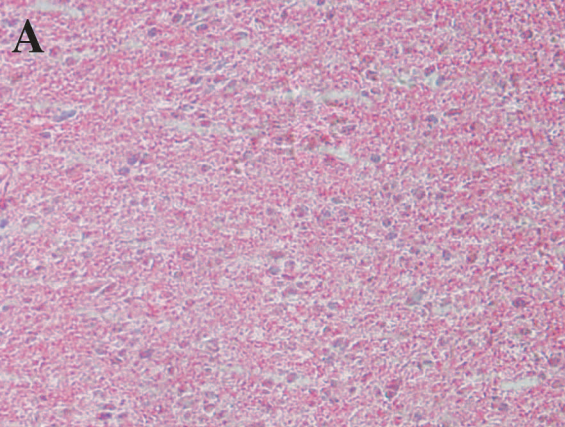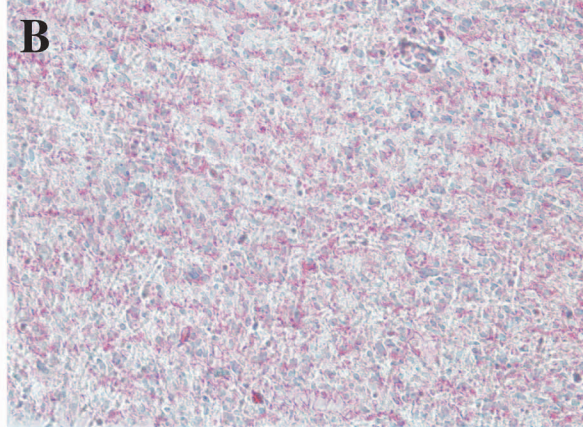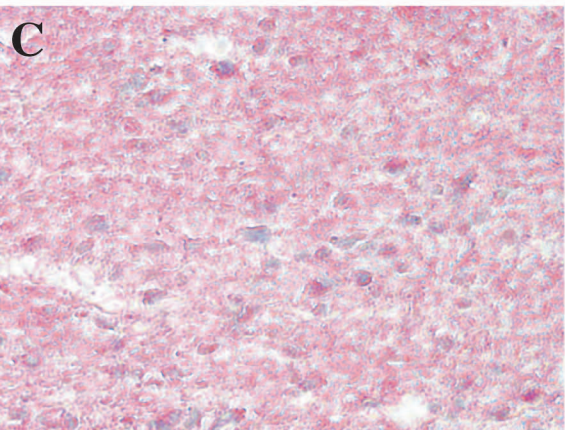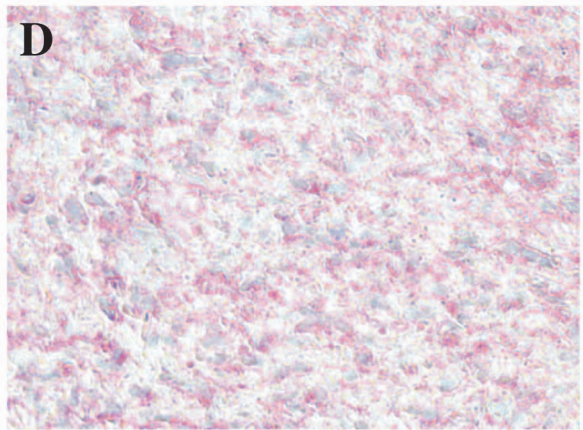

Supplement: NIHMS651039-supplement-Supplementary_Figure_2.pdf [file NIHMS651039-supplement-Supplementary_Figure_2.pdf]
